# Top 10 most cited articles from 2002–2011

|    |                                                                                                                                                                                                                                                                                                            |               |
|----|------------------------------------------------------------------------------------------------------------------------------------------------------------------------------------------------------------------------------------------------------------------------------------------------------------|---------------|
| 1  | <i>Falls in older people: epidemiology, risk factors and strategies for prevention</i> Rubenstein, LZ. (2006) 35(suppl 2): ii37-ii41<br>[http://ageing.oxfordjournals.org/content/35/suppl_2/ii37.full.pdf]                                                                                                | 159 citations |
| 2  | <i>Risk factors and risk assessment tools for falls in hospital in-patients: a systematic review</i> Oliver, D; Daly, F; Martin, FC; McMurdo, MET. (2004) 33(2): 122-130 [http://ageing.oxfordjournals.org/content/33/2/122.full.pdf]                                                                      | 141 citations |
| 3  | <i>Community-based group exercise improves balance and reduces falls in at-risk older people: a randomised controlled trial.</i> Oliver, D; Daly, F; Martin, FC; McMurdo, MET. (2003) 32(4): 407-414<br>[http://ageing.oxfordjournals.org/content/32/4/407.full.pdf]                                       | 138 citations |
| 4  | <i>Occurrence and outcome of delirium in medical in-patients: a systematic literature review</i> Siddiqi, N; House, AO; Holmes, JD. (2006) 35(4): 350-364<br>[http://ageing.oxfordjournals.org/content/35/4/350.full.pdf]                                                                                  | 116 citations |
| 5  | <i>What are the components of effective stroke unit care?</i> Langhorne, P; Pollock, A. (2002) 31(5): 365-371<br>[http://ageing.oxfordjournals.org/content/31/5/365.full.pdf]                                                                                                                              | 108 citations |
| 6  | <i>Age-related differences in walking stability</i> Menz, HB; Lord, SR; Fitzpatrick, RC. (2003) 32(2): 137-142<br>[http://ageing.oxfordjournals.org/content/32/2/137.full.pdf]                                                                                                                             | 102 citations |
| 7  | <i>Explosive power and asymmetry in leg muscle function in frequent fallers and non-fallers aged over 65</i> Skelton, DA; Kennedy, J; Rutherford, OM. (2002) 31(2): 119-125<br>[http://ageing.oxfordjournals.org/content/31/2/119.full.pdf]                                                                | 100 citations |
| 8  | <i>Vitamin B12 and folate deficiency in later life</i> Clarke, R; Evans, JG; Schneede, J; Nexø, E; Bates, C; Fletcher, A; Prentice, A; Johnston, C; Ueland, PM; Refsum, H; Sherliker, P; Birks, J; Whitlock, G; Breeze, E; (2004) 33(1): 34-41 [http://ageing.oxfordjournals.org/content/33/1/34.full.pdf] | 95 citations  |
| 9  | <i>Vitamin D supplementation improves neuromuscular function in older people who fall</i> Dhese, JK; Jackson, SHD; Bearne, LM; Moniz, C; Hurley, MV; Swift, CG; Allain, TJ. (2004) 33(6): 589-595<br>[http://ageing.oxfordjournals.org/content/33/6/589.full.pdf]                                          | 88 citations  |
| 10 | <i>Development and initial validation of the Falls Efficacy Scale-International (FES-I)</i> Yardley, L; Beyer, N; Hauer, K; Kempen, G; Piot-Ziegler, C; Todd, C. (2005) 34(6): 614-619 [http://ageing.oxfordjournals.org/content/34/6/614.full.pdf]                                                        | 86 citations  |
